# Supplementary material for: Application of an electron-transfer catalyst in light-induced aerobic oxidation of alcohols
Source: Royal Society of Chemistry journal article supplement (doi:10.1039/c8cc07137c), 2018-01-01
Supplement: c8cc07137c1.pdf [file c8cc07137c1.pdf]

### Synthesis of Zn-L-Cl

Typically, ZnCl<sub>2</sub> hydrated salt (0.15g, ~1.0 mmol) and L-Cl (0.32g, 0.4 mmol) were added to the mixed solvent of DMF (40 mL) and ethanol (40 mL) in a glass beaker. The mixed reagents were stirred for 20 min to give precipitate. The precipitate was collected by filtration and washed three times with acetone and dried at 350 K in an oven for 1h, giving Zn-L-Cl as an orange solid. Yield: 61%. Calculated for C<sub>48</sub>H<sub>36</sub>N<sub>8</sub>Zn<sub>2</sub>Cl<sub>6</sub>·8H<sub>2</sub>O (1212.45): C, 47.55; H, 4.32; N, 9.24; Found: C, 47.70; H, 4.05; N, 9.08.

### Photocatalytic reaction

In general, a mixture of 4 μmol of Zn-L-Cl, 0.5 mmol alcohols and 2ml acetonitrile was placed in a quartz tube. The photoinduced oxidation reaction was initiated at room temperature in air atmosphere under light irradiation with different wavelengths. After the reaction, the Zn-L-Cl was separated by centrifugation, thoroughly washed with diethyl ether, and then reused in subsequent runs. The conversion of the product was calculated by GC analysis. The other control experiments were carried out under the same condition except changing the amount of Zn-L-Cl, wavelengths, or exposure to N<sub>2</sub>/O<sub>2</sub> atmosphere.

The determined concentration data of reactants and products are further treated with expressions given as follows, where the conversion of substrates is expressed by Con.:

$$\text{Con. (\%)} = 100 \times (C_0 - C_i) / C_0 \quad (1)$$

Where C<sub>0</sub> and C<sub>i</sub> are the molar concentrations of substrates before and after the photocatalytic reaction, respectively. The selectivity to product is shown by Sel.:

$$\text{Sel. (\%)} = 100 \times C_j / (C_0 - C_i) \quad (2)$$

Where C<sub>j</sub> is the molar concentration of product. The turnover frequency (TOF) value of the reaction is calculated by an expression as follows:

$$\text{TOF (h}^{-1}\text{)} = (\text{con.} \times n_p) / (n_c \times h) \quad (3)$$

Where n<sub>p</sub> is the number of moles of substrates, n<sub>c</sub> is the number of moles of catalyst, h represents the reaction time.

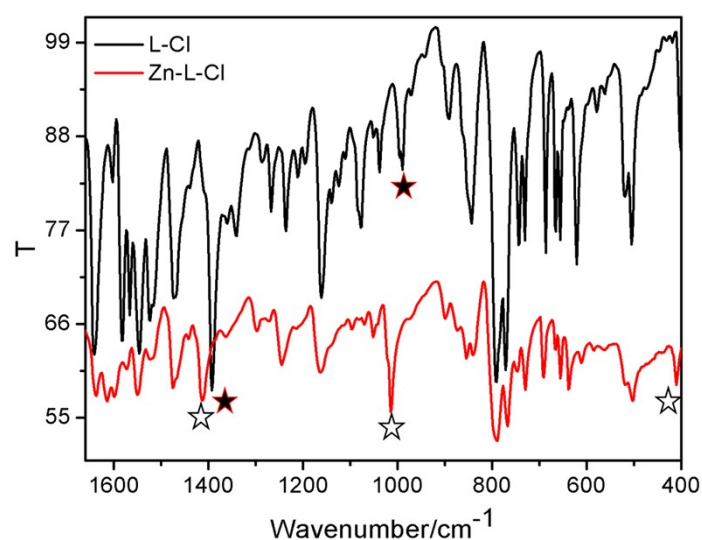

Figure S1. FT-IR spectra of L-Cl and Zn-L-Cl.

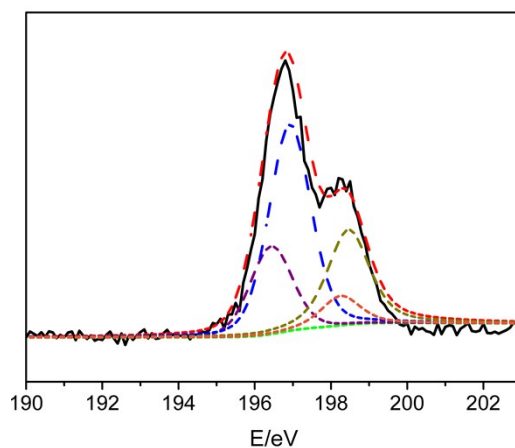

Figure S2. Cl 2p XPS core-level spectra of Zn-L-Cl. The horizontal axis represents the binding energy (dashed line: resolved and sum of peaks)

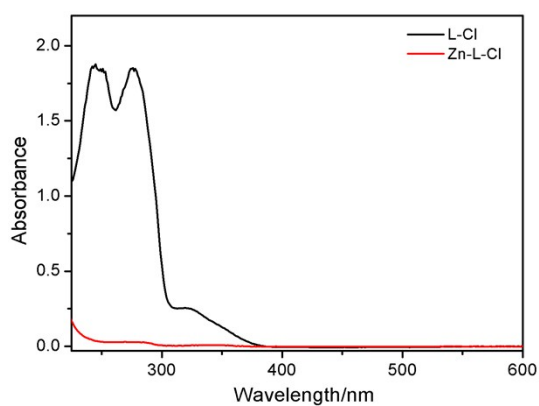

Figure S3. UV-vis absorption spectra of L-Cl and Zn-L-Cl saturated in acetonitrile solution.

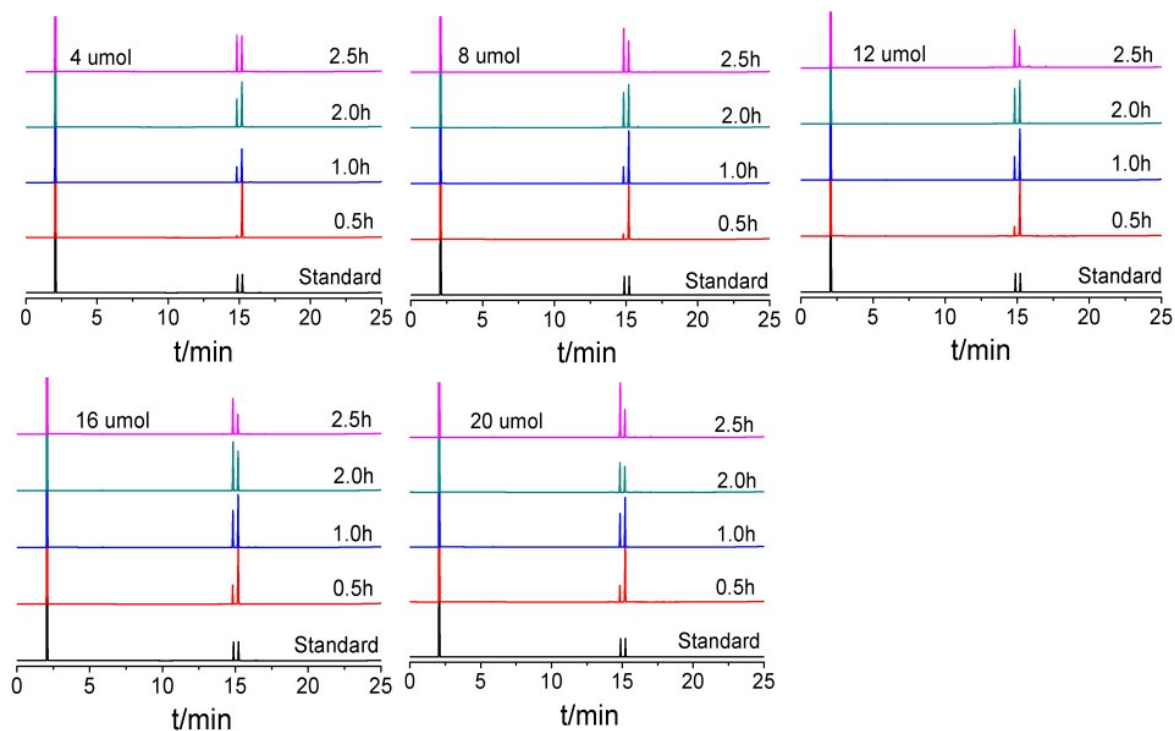

Figure S4 Gas chromatomap showing the conversion of 4-methoxy BA into corresponding aldehyde in presence of different amounts of Zn-L-Cl.

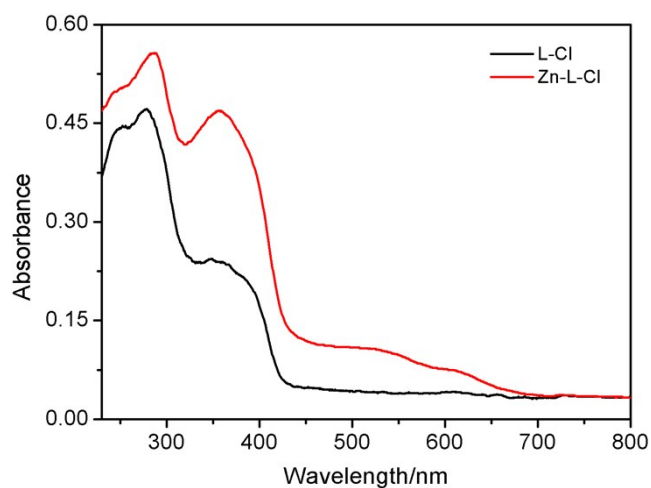

Figure S5. UV-vis diffuse-reflectance spectra of L-Cl and Zn-L-Cl.

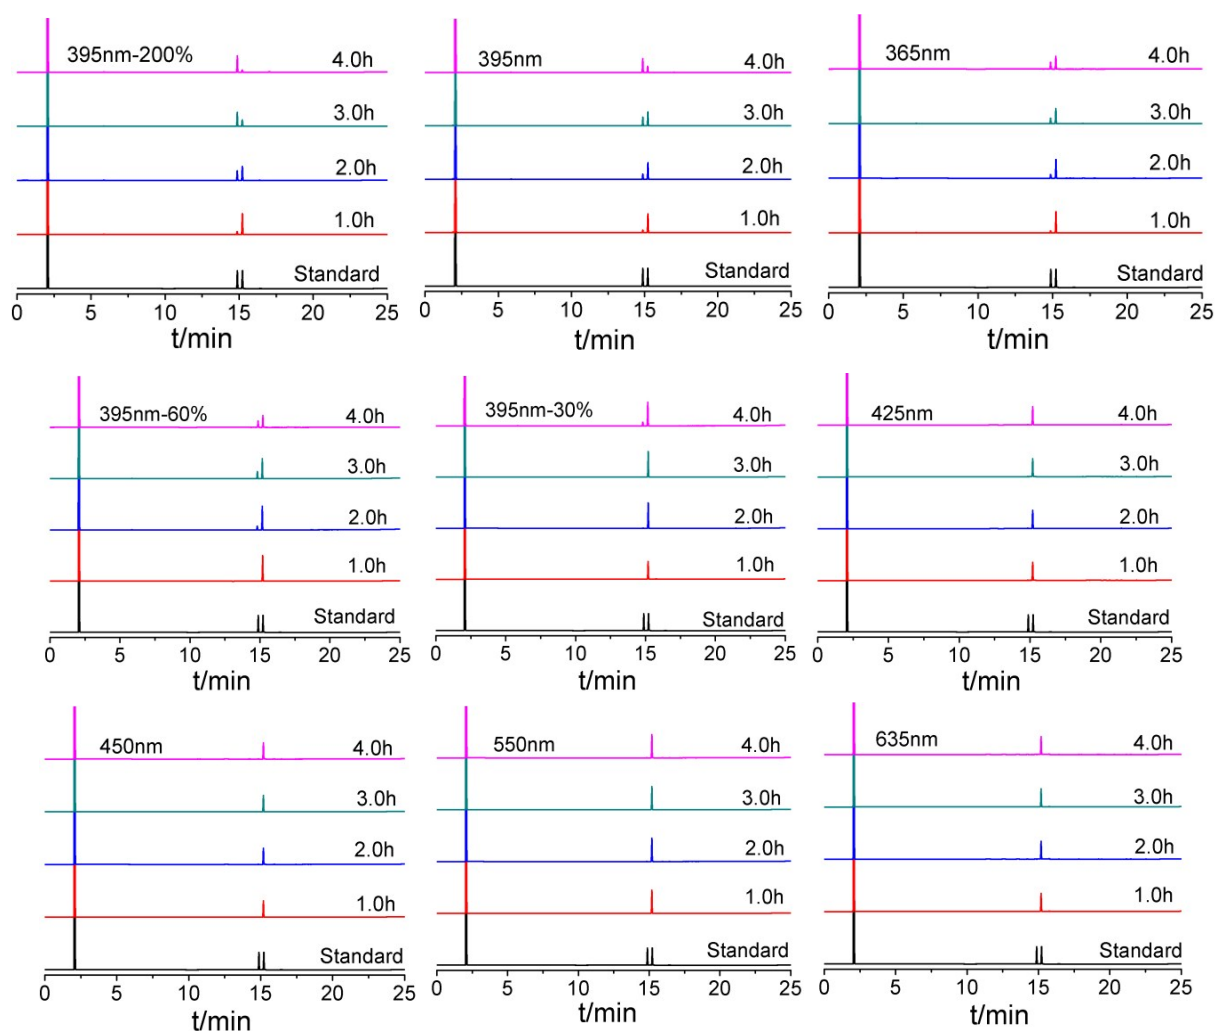

Figure S6 Gas chromatogram showing the conversion of 4-methoxy BA into corresponding aldehyde under irradiation of light sources with different intensities and wavelengths.

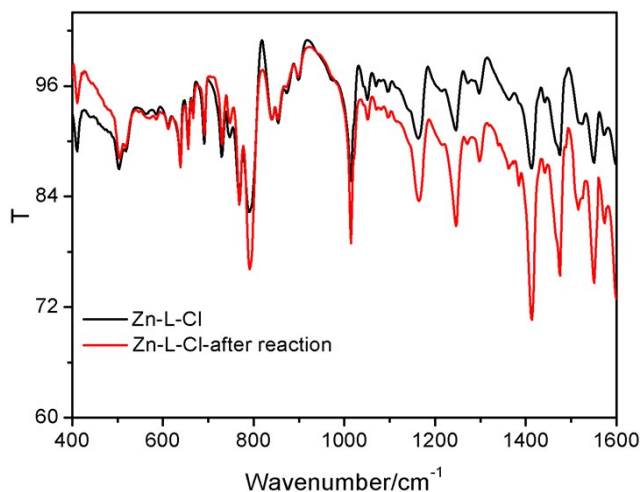

Figure S7. FT-IR spectra of Zn-L-Cl before and after five runs of reactions.

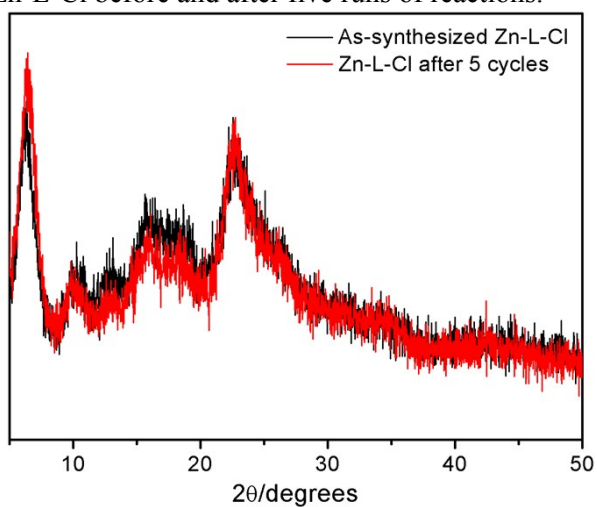

Figure S8. PXRD patterns for Zn-L-Cl before and after five runs of reactions.

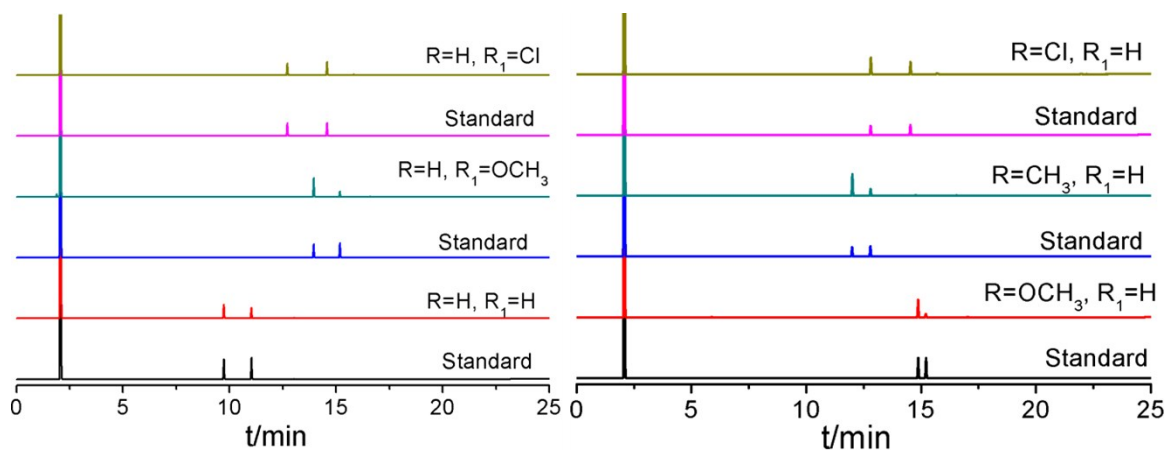

Figure S9. Gas chromatogram showing the conversion of benzyl alcohols with different substituted groups into corresponding aldehydes.

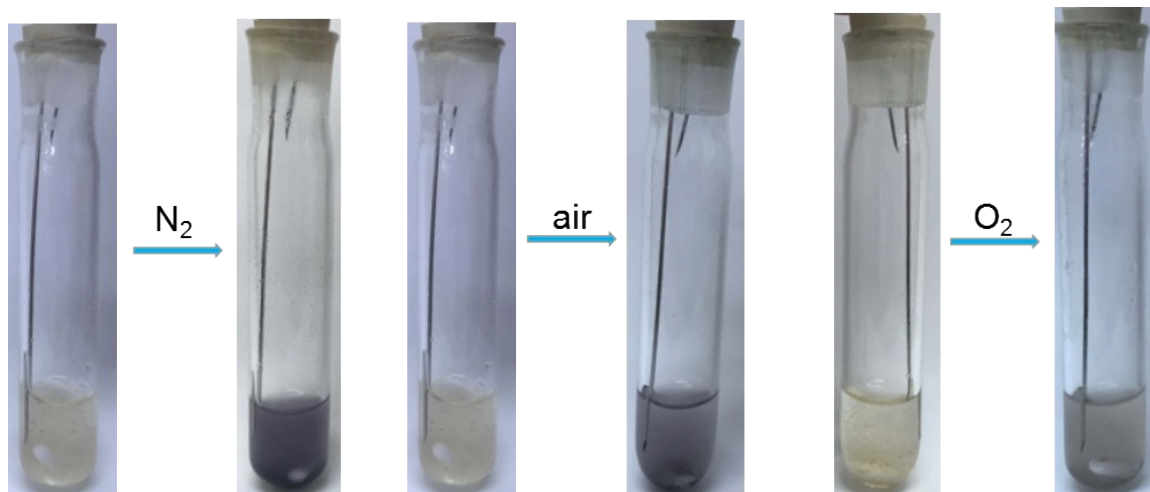

Figure S10. The color change of the reaction in three different atmospheres ( $N_2$ , air, and  $O_2$ ).

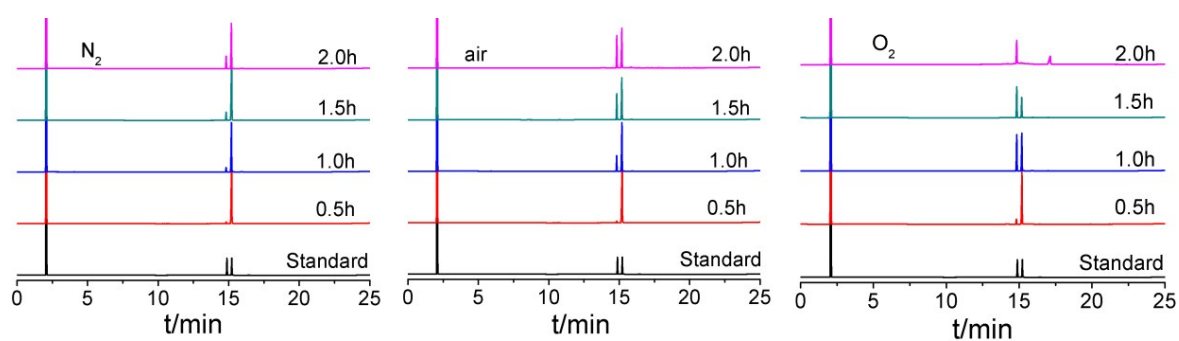

Figure S11. Gas chromatogram showing the conversion of 4-methoxy BA into corresponding aldehyde in three different atmospheres ( $N_2$ , air, and  $O_2$ ).

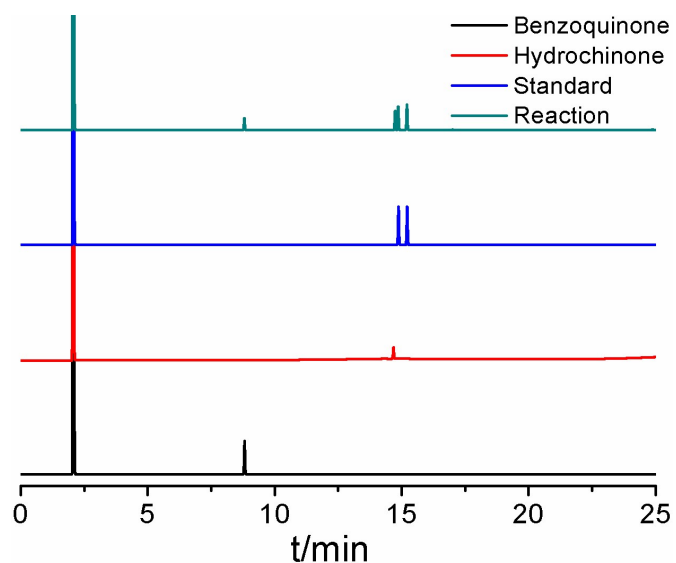

Figure S12. Gas Chromatogram of the radical scavenger benzoquinone (black line) and its reduced product hydroquinone (red line), standard 4-methoxy BA and 4-methoxybenzaldehyde (blue line), and the reaction mixture after light irradiation for 2 h (green line).

Table S1: Aerobic oxidation of 4-methoxy BA into corresponding aldehyde in different solvents.

| Entry | Solvent      | Conversion (%) | Selectivity (%) |
|-------|--------------|----------------|-----------------|
| 1     | Ethanol      | 3              | >99             |
| 2     | Methanol     | 2              | >99             |
| 3     | Water        | 2              | >99             |
| 4     | Acetonitrile | 73             | >99             |
| 5     | Acetone      | 55             | >99             |

Standard conditions: 4-methoxybenzyl alcohols (0.5 mmol), 4  $\mu$ mol Zn-L-Cl, 2ml solvent, rt, 4h, conversion was calculated by GC peaks.

Table S2: Comparison with different catalysts about selective oxidation of 4-methoxy BA.

| Material  | Entry              | Substrate/mmol | Catalyst                                  | Cocatalyst                                                                                        | Oxidant                             |
|-----------|--------------------|----------------|-------------------------------------------|---------------------------------------------------------------------------------------------------|-------------------------------------|
| Nano      | 1 <sup>[1]</sup>   | 2              | Au-Pd alloy NPs                           | -                                                                                                 | -                                   |
|           | 2 <sup>[2]</sup>   | 0.05           | Au-Cu alloy NPs                           | -                                                                                                 | O <sub>2</sub>                      |
|           | 3 <sup>[3]</sup>   | 5ml            | Pd NPs                                    | -                                                                                                 | O <sub>2</sub>                      |
|           | 4 <sup>[4]</sup>   | 0.5            | Au@Ph-PMO NPs                             | -                                                                                                 | air                                 |
|           | 5 <sup>[5]</sup>   | 0.1            | HNb <sub>3</sub> O <sub>8</sub> NS        | -                                                                                                 | O <sub>2</sub>                      |
|           | 6 <sup>[6]</sup>   | 0.5            | nanoshell carbon (NSC)                    | -                                                                                                 | 67% HNO <sub>3</sub>                |
|           | 7 <sup>[7]</sup>   | 1              | graphene oxide                            | -                                                                                                 | 67% HNO <sub>3</sub>                |
| Complex   | 8 <sup>[8]</sup>   | 1              | Zinc(II) Complex                          | Zn                                                                                                | O <sub>2</sub> , K <sup>t</sup> BuO |
|           | 9 <sup>[9]</sup>   | 0.3            | UiO-67-TEMPO                              | -                                                                                                 | t-Bu-ONO, air                       |
|           | 10 <sup>[10]</sup> | 1              | Cu <sub>3</sub> (BTC) <sub>2</sub>        | TEMPO                                                                                             | O <sub>2</sub>                      |
|           | 11 <sup>[11]</sup> | 0.5            | Ru(III) catalysts                         | -                                                                                                 | H <sub>2</sub> O <sub>2</sub>       |
|           | 12 <sup>[12]</sup> | 1              | Cu-MOF-2                                  | TEMPO                                                                                             | O <sub>2</sub>                      |
|           | 13 <sup>[13]</sup> | 20             | manganese(V) nitrido complex              | [Ru(bpy) <sub>3</sub> ]Cl <sub>2</sub> ,<br>[Co(NH <sub>3</sub> ) <sub>5</sub> Cl]Cl <sub>2</sub> | -                                   |
|           | 14 <sup>[14]</sup> | 0.2            | Cerium Complexes                          | -                                                                                                 | O <sub>2</sub>                      |
| Other     | 15 <sup>[15]</sup> | 0.2            | Mixed-Valence Vanadium Oxide              | -                                                                                                 | -                                   |
|           | 16 <sup>[16]</sup> | 0.8            | Porous polymerized organocatalysts (PPOs) | TEMPO                                                                                             | hypochlorite                        |
|           | 17 <sup>[17]</sup> | 0.29           | 9-Fluorenone                              | DMSO                                                                                              | O <sub>2</sub> or air               |
|           | 18 <sup>[18]</sup> | 0.1            | Co@C-N nanoreactor                        | -                                                                                                 | air                                 |
| This work | 19                 | 0.5            | Zn-L-Cl                                   | -                                                                                                 | air                                 |

| Material | Entry | Catalyst amount | T/° | Time/h | Con.% | Sel.% | Yield% | TOF/h |
|----------|-------|-----------------|-----|--------|-------|-------|--------|-------|
| Nano     | 1     | 50 mg           | 45  | 2      | -     | 94    | 100    | 57.5  |
|          | 2     | 20 mg           | 20  | 6      | 74    | -     | -      | -     |
|          | 3     | 0.1 g           | 130 | 5      | 60.5  | 99    | -      | -     |
|          | 4     | 1.5 mol%        | 80  | 5      | 100   | 95    | -      | -     |
|          | 5     | 8 mg            | 25  | 4      | 63    | 85    | -      | -     |
|          | 6     | 10 mg           | 90  | 3      | 97    | 84    | -      | -     |
|          | 7     | 5 wt%           | 90  | 2.5    | -     | -     | 94     | -     |
| Complex  | 8     | 5 mol%          | 60  | 24     | -     | -     | 71     | -     |

|           |    |         |     |       |      |     |      |            |
|-----------|----|---------|-----|-------|------|-----|------|------------|
|           | 9  | 1 mol%  | 80  | 24    | -    | -   | 99   | 13.5(2.5h) |
|           | 10 | 150 mg  | 75  | 22    | -    | -   | 42   | -          |
|           | 11 | 1 mol%  | 100 | 6     | -    | -   | 99   | -          |
|           | 12 | 100 mg  | 75  | 16    | -    | 99  | 99   | -          |
|           | 13 | 20 umol | -   | 0.5   | -    | -   | -    | -          |
|           | 14 | 5 mol%  | 120 | 20    | -    | -   | 99   | -          |
| Other     | 15 | 50 mg   | 30  | 16    | 98   | 100 | 98   | -          |
|           | 16 | 3 mg    | 0   | 10    | 99   | 98  | -    | -          |
|           | 17 | 3 mol%  | rt  | 16-72 | -    | -   | 98   | -          |
|           | 18 | 10 mol  | 110 | 18    | 4    | 81  | 88   | -          |
| This work | 19 | 4 umol  | rt  | 4     | 90.7 | 99  | 90.7 | 29         |

Table3: The wavelength and out power of different light sources.

| Wavelength/nm | Out Power/mw | Lop/mA |
|---------------|--------------|--------|
| 365           | >420         | 700    |
| 395           | >450         | 700    |
| 425           | >280         | 700    |
| 450           | >320         | 700    |
| 550           | >220         | 700    |
| 635           | >320         | 700    |

## References

- [1] S. Sarina, H. Zhu, E. Jaatinen, Q. Xiao, H. Liu, J. Jia, C. Chen and J. Zhao, *J. Am. Chem. Soc.*, 2013, **135**, 5793.
- [2] Y. Sugano, Y. Shiraishi, D. Tsukamoto, S. Ichikawa, S. Tanaka and T. Hirai, *Angew. Chem. Int. Ed.*, 2013, **52**, 5295.
- [3] F. Wang, Z. Lu, L. Yang, Y. Zhang, Q. Tang, Y. Guo, X. Ma and Z. Yang, *Chem. Commun.*, 2013, **49**, 6626.
- [4] H. Zou, R. Wang, J. Dai, Y. Wang, X. Wang, Z. Zhang and S. Qiu, *Chem. Commun.*, 2015, **51**, 14601.
- [5] S. Liang, L. Wen, S. Lin, J. Bi, P. Feng, X. Fu and L. Wu, *Angew. Chem. Int. Ed.*, 2014, **53**, 2951.
- [6] Y. Kuang, N. M. Islam, Y. Nabae, T. Hayakawa and M. -a. Kakimoto, *Angew. Chem. Int. Ed.*, 2010, **49**, 436.
- [7] Y. Cui, Y. H. Lee and J. W. Yang, *Sci. Rep.*, 2017, **7**, 3146.
- [8] R. Pramanick, R. Bhattacharjee, D. Sengupta, A. Datta and S. Goswami, *Inorg. Chem.*, 2018, **57**, 6816.
- [9] K. M. Zwolinski and M. J. Chmielewski, *ACS Appl. Mater. Interfaces*, 2017, **9**, 33956.
- [10] A. Dhakshinamoorthy, M. Alvaro and H. Garcia, *ACS Catal.*, 2011, **1**, 48.
- [11] S. Wu, L. Chen, B. Yin and Y. Li, *Chem. Commun.*, 2015, **51**, 9884.
- [12] Y. Qi, Y. Luan, J. Yu, X. Peng and G. Wang, *Chem. Eur. J.*, 2015, **21**, 1589.



- [13] G. Chen, L. Chen, L. Ma, H. -K. Kwong and T. -C. Lau, *Chem. Commun.*, 2016, **52**, 9271.
- [14] S. Shirase, K. Shinohara, H. Tsurugi and K. Mashima, *ACS Catal.*, 2018, **8**, 6939.
- [15] S. Zavahir, Q. Xiao, S. Sarina, J. Zhao, S. Bottle, M. Wellard, J. Jia, L. Jing, Y. Huang, J. P. Blinco, H. Wu and H. -Y. Zhu, *ACS Catal.*, 2016, **6**, 3580.
- [16] Y. Huangfu, Q. Sun, S. Pan, X. Meng and F. -S. Xiao, *ACS Catal.*, 2015, **5**, 1556.
- [17] W. Schilling, D. Riemer, Y. Zhang, N. Hatami and S. Das, *ACS Catal.*, 2018, **8**, 5425.
- [18] H. Chen, K. Shen, Q. Mao, J. Chen and Y. Li, *ACS Catal.*, 2018, **8**, 1417.
